# Supplementary material for: Tuning the visible colour of octahedral manganese(iii) phthalocyanines via axial ligand exchange
Source: Royal Society of Chemistry journal article supplement (doi:10.1039/d3dt03518b), 2023-12-18
Supplement: d3dt03518b1.pdf [file d3dt03518b1.pdf]

## Electronic Supporting Information

# Tuning the Visible Colour of Octahedral Manganese(III) Phthalocyanines via Axial Ligand Exchange

Declan McKearney, Kyle MacDonald, Min Suk Kim, Vance E. Williams  
and Daniel B. Leznoff\*

Department of Chemistry, Simon Fraser University, 8888 University Drive, Burnaby, British

Columbia, V5A 1S6, Canada. Email: [dleznoff@sfu.ca](mailto:dleznoff@sfu.ca)

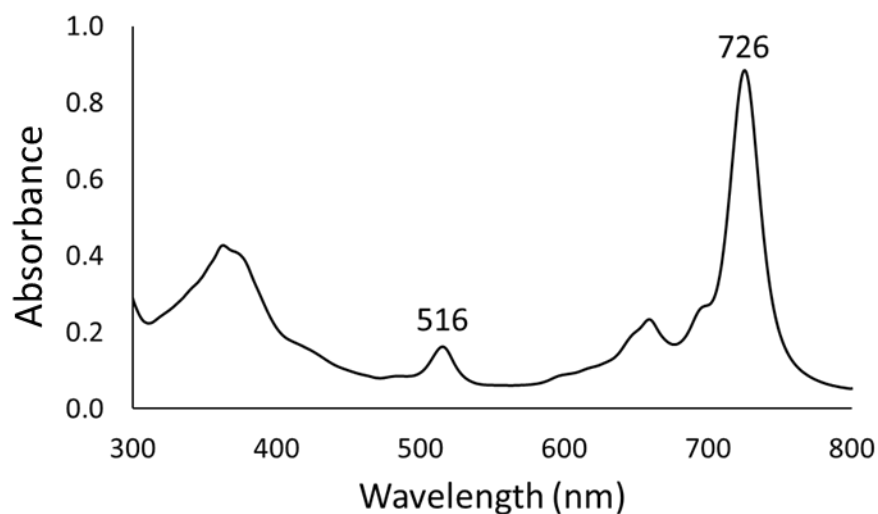

**Figure S1.** Electronic absorption spectrum of [PcMnMeIm<sub>2</sub>]<sup>+</sup> in DCB.

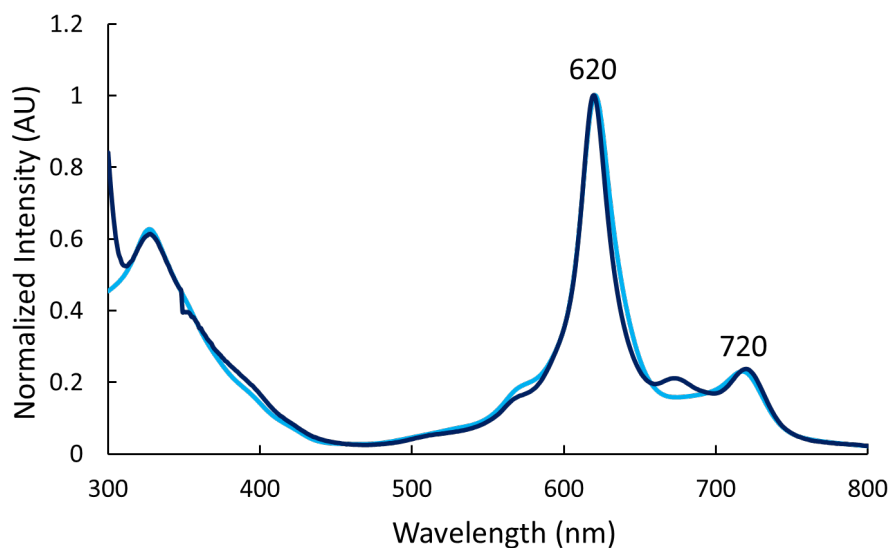

**Figure S2.** Electronic absorption spectra of  $[\text{PcMn}]^+$  in DCB with an excess of water and Py (light blue) or DMAP (dark blue) after 24 hours.

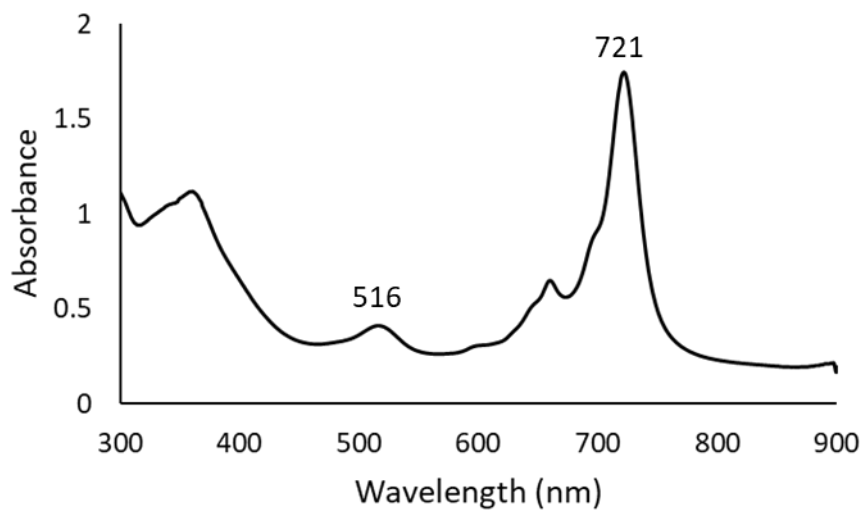

**Figure S3.** Electronic absorption spectrum of  $[\text{PcMn}(\text{MeCN})_2]^+$  in the presence of an excess of water for 24 hours to produce  $[\text{PcMn}(\text{H}_2\text{O})_2]^+$  in DCB.

**Table S1.** Crystallographic information table for **(PcMnDMAP)<sub>2</sub>O**, **(PcMnMelm)<sub>2</sub>O**, and **[PcMn(H<sub>2</sub>O)<sub>2</sub>]<sup>+</sup>**:

| Compound Reference                         | <b>(PcMnDMAP)<sub>2</sub>O</b>                                                                                       | <b>(PcMnMelm)<sub>2</sub>O</b>                                                      | <b>[PcMn(H<sub>2</sub>O)<sub>2</sub>]<sup>+</sup></b>                                 |
|--------------------------------------------|----------------------------------------------------------------------------------------------------------------------|-------------------------------------------------------------------------------------|---------------------------------------------------------------------------------------|
| Chemical Formula                           | C <sub>97.5</sub> H <sub>58</sub> N <sub>22</sub> O <sub>1</sub> Mn <sub>2</sub><br>Cl <sub>4</sub> SbF <sub>6</sub> | C <sub>84</sub> H <sub>52</sub> N <sub>20</sub> OMn <sub>2</sub><br>Cl <sub>4</sub> | C <sub>40</sub> H <sub>32</sub> N <sub>12</sub> O <sub>2</sub> Mn<br>SbF <sub>6</sub> |
| Formula Mass                               | 2041.08                                                                                                              | 1609.14                                                                             | 1003.46                                                                               |
| a/Å                                        | 13.9153(5)                                                                                                           | 10.2034(3)                                                                          | 6.7827(1)                                                                             |
| b/Å                                        | 14.9330(4)                                                                                                           | 13.0541(4)                                                                          | 11.8143(2)                                                                            |
| c/Å                                        | 25.6822(8)                                                                                                           | 13.5633(4)                                                                          | 13.0385(2)                                                                            |
| α/°                                        | 89.600(2)                                                                                                            | 91.015(2)                                                                           | 87.0700(10)                                                                           |
| β/°                                        | 80.169(2)                                                                                                            | 109.836(2)                                                                          | 80.0800(10)                                                                           |
| γ/°                                        | 88.144(2)                                                                                                            | 91.205(2)                                                                           | 83.3940(10)                                                                           |
| Unit cell volume/Å <sup>3</sup>            | 5255.6(3)                                                                                                            | 1698.42(9)                                                                          | 1021.84(3)                                                                            |
| Temperature/K                              | 150(2)                                                                                                               | 150(2)                                                                              | 150(2)                                                                                |
| Space group                                | P-1                                                                                                                  | P-1                                                                                 | P-1                                                                                   |
| Number of formula unit per cell/Z          | 2                                                                                                                    | 1                                                                                   | 1                                                                                     |
| Radiation type                             | Cu Kα                                                                                                                | Cu Kα                                                                               | Cu Kα                                                                                 |
| Absorption coefficient, μ/mm <sup>-1</sup> | 5.425                                                                                                                | 5.035                                                                               | 8.454                                                                                 |
| No. of reflections collected               | 76360                                                                                                                | 15081                                                                               | 14604                                                                                 |
| No. unique reflections                     | 18219                                                                                                                | 5844                                                                                | 3536                                                                                  |
| R <sub>int</sub>                           | 0.0664                                                                                                               | 0.0212                                                                              | 0.0444                                                                                |
| Final R <sub>1</sub> values (I>2σ(I))      | 0.0986                                                                                                               | 0.0333                                                                              | 0.0252                                                                                |
| Final wR(F <sup>2</sup> ) values (I>2σ(I)) | 0.2809                                                                                                               | 0.0933                                                                              | 0.0685                                                                                |
| Final R <sub>1</sub> values (all data)     | 0.1180                                                                                                               | 0.0350                                                                              | 0.0272                                                                                |
| Final wR(F <sup>2</sup> ) (all data)       | 0.2989                                                                                                               | 0.0947                                                                              | 0.0698                                                                                |
| Goodness of fit                            | 1.065                                                                                                                | 1.089                                                                               | 1.060                                                                                 |

**Table S2.** Crystallographic information table for **[PcMn(Melm)<sub>2</sub>]<sup>+</sup>** and **[PcMn(Py)<sub>2</sub>]<sup>+</sup>**:

| Compound Reference                         | <b>[PcMn(Melm)<sub>2</sub>]<sup>+</sup></b>                        | <b>[PcMn(Py)<sub>2</sub>]<sup>+</sup></b>                                                                         |
|--------------------------------------------|--------------------------------------------------------------------|-------------------------------------------------------------------------------------------------------------------|
| Chemical Formula                           | C <sub>48</sub> H <sub>40</sub> N <sub>16</sub> MnSbF <sub>6</sub> | C <sub>125</sub> H <sub>76</sub> N <sub>20</sub> Mn <sub>2</sub> Sb <sub>2</sub> F <sub>12</sub> Cl <sub>14</sub> |
| Formula Mass                               | 1131.65                                                            | 2935.74                                                                                                           |
| a/Å                                        | 8.7345(2)                                                          | 23.6576(4)                                                                                                        |
| b/Å                                        | 9.3932(2)                                                          | 23.6576 (4)                                                                                                       |
| c/Å                                        | 15.3182(2)                                                         | 42.1881(9)                                                                                                        |
| α/°                                        | 85.4520(10)                                                        | 90                                                                                                                |
| β/°                                        | 89.3170(10)                                                        | 90                                                                                                                |
| γ/°                                        | 70.5600(10)                                                        | 90                                                                                                                |
| Unit cell volume/Å <sup>3</sup>            | 1181.26(4)                                                         | 23611.9(9)                                                                                                        |
| Temperature/K                              | 150(2)                                                             | 150(2)                                                                                                            |
| Space group                                | P-1                                                                | I 41/a                                                                                                            |
| Number of formula unit per cell/Z          | 1                                                                  | 8                                                                                                                 |
| Radiation type                             | Cu Kα                                                              | Cu Kα                                                                                                             |
| Absorption coefficient, μ/mm <sup>-1</sup> | 7.382                                                              | 8.886                                                                                                             |
| No. of reflections collected               | 18116                                                              | 62105                                                                                                             |
| No. unique reflections                     | 4089                                                               | 10438                                                                                                             |
| R <sub>int</sub>                           | 0.0356                                                             | 0.0343                                                                                                            |
| Final R <sub>1</sub> values (I>2σ(I))      | 0.0267                                                             | 0.0768                                                                                                            |
| Final wR(F <sup>2</sup> ) values (I>2σ(I)) | 0.0706                                                             | 0.2240                                                                                                            |
| Final R <sub>1</sub> values (all data)     | 0.0275                                                             | 0.0912                                                                                                            |
| Final wR(F <sup>2</sup> ) (all data)       | 0.0713                                                             | 0.2249                                                                                                            |
| Goodness of fit                            | 1.056                                                              | 1.017                                                                                                             |

**Table S3.** Crystallographic information table for **[PcMn(THF)<sub>2</sub>]<sup>+</sup>** and **[PcMn(OPPh<sub>3</sub>)<sub>2</sub>]<sup>+</sup>**:

| Compound Reference                         | <b>[PcMn(OPPh<sub>3</sub>)<sub>2</sub>]<sup>+</sup></b>                                                         | <b>[PcMn(THF)<sub>2</sub>]<sup>+</sup></b>                                       |
|--------------------------------------------|-----------------------------------------------------------------------------------------------------------------|----------------------------------------------------------------------------------|
| Chemical Formula                           | C <sub>74</sub> H <sub>46</sub> N <sub>8</sub> O <sub>2</sub> P <sub>2</sub> Cl <sub>2</sub> MnSbF <sub>6</sub> | C <sub>44</sub> H <sub>39</sub> N <sub>8</sub> MnO <sub>3</sub> SbF <sub>6</sub> |
| Formula Mass                               | 1502.72                                                                                                         | 1018.52                                                                          |
| a/Å                                        | 9.3814(4)                                                                                                       | 8.5811(1)                                                                        |
| b/Å                                        | 11.7093(5)                                                                                                      | 10.4045(1)                                                                       |
| c/Å                                        | 15.1727(7)                                                                                                      | 23.5751(2)                                                                       |
| α/°                                        | 77.135(4)                                                                                                       | 87.2870(10)                                                                      |
| β/°                                        | 81.131(4)                                                                                                       | 81.7290(10)                                                                      |
| γ/°                                        | 89.347(4)                                                                                                       | 80.1210(10)                                                                      |
| Unit cell volume/Å <sup>3</sup>            | 1604.99(13)                                                                                                     | 2051.50(4)                                                                       |
| Temperature/K                              | 150(2)                                                                                                          | 150(2)                                                                           |
| Space group                                | P1                                                                                                              | P-1                                                                              |
| Number of formula unit per cell/Z          | 1                                                                                                               | 2                                                                                |
| Radiation type                             | Cu Kα                                                                                                           | Cu Kα                                                                            |
| Absorption coefficient, μ/mm <sup>-1</sup> | 6.791                                                                                                           | 8.420                                                                            |
| No. of reflections collected               | 16858                                                                                                           | 32711                                                                            |
| No. unique reflections                     | 8272                                                                                                            | 7379                                                                             |
| R <sub>int</sub>                           | 0.0548                                                                                                          | 0.0516                                                                           |
| Final R <sub>1</sub> values (I>2σ(I))      | 0.0766                                                                                                          | 0.0633                                                                           |
| Final wR(F <sup>2</sup> ) values (I>2σ(I)) | 0.1962                                                                                                          | 0.1491                                                                           |
| Final R <sub>1</sub> values (all data)     | 0.0805                                                                                                          | 0.0702                                                                           |
| Final wR(F <sup>2</sup> ) (all data)       | 0.1998                                                                                                          | 0.1538                                                                           |
| Goodness of fit                            | 1.066                                                                                                           | 1.050                                                                            |
